# Supplementary material for: Establishment of Adenomyosis Organoids as a Preclinical Model to Study Infertility
Source: MDPI journal article supplement (doi:10.3390/jpm12020219), 2022-02-04
Supplement: s1 [file s1]

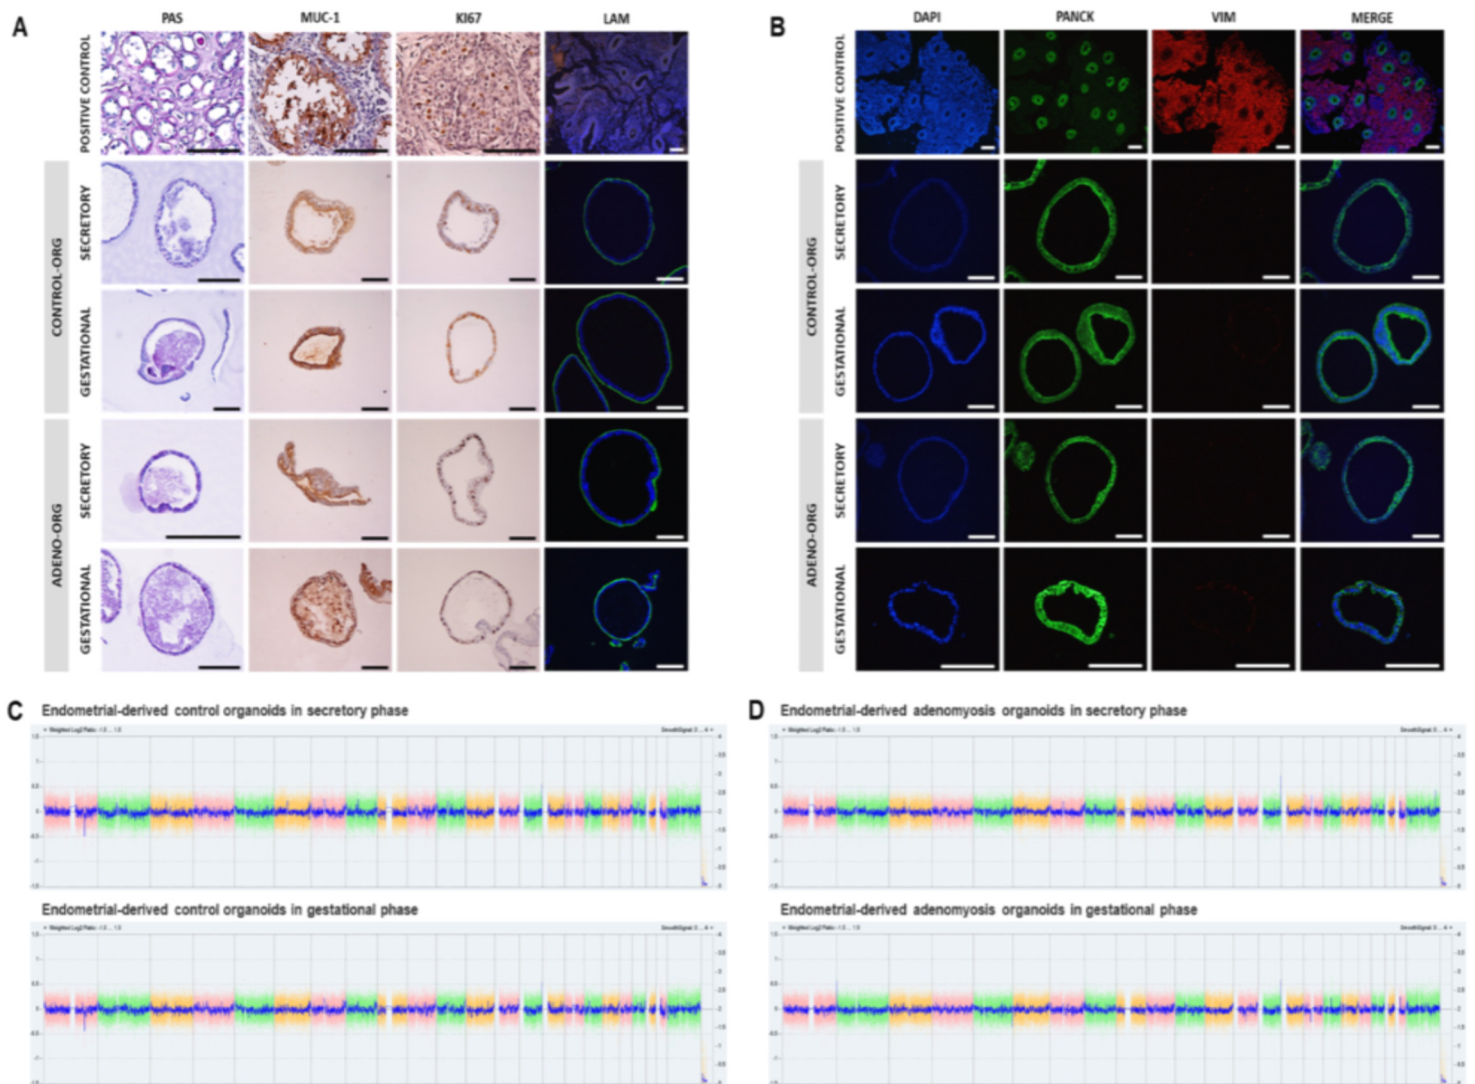

**Figure S1.** Characterization of glandular origin, proliferation, and epithelial polarity in human secretory and gestational organoids. Representative images of (A) PAS staining as well as MUC-1, Ki67, and laminin expression by IHC, (B) pan-cytokeratin and vimentin staining by IF. Chromosomal stability in secretory and gestational Control (C) and Adeno (D) organoids. Scale bars are 100  $\mu$ m. Kidney, endometrium, and breast cancer samples were used as positive controls.
