# Supplementary material for: Establishment of Adenomyosis Organoids as a Preclinical Model to Study Infertility
Source: MDPI journal article supplement (doi:10.3390/jpm12020219), 2022-02-04
Supplement: s1 [file s1]

**Supplementary Table S3. Primers sequences**

| <b>GENE</b>                            | <b>Forward sequence</b> | <b>Reverse sequence</b> |
|----------------------------------------|-------------------------|-------------------------|
| <b><i>SPP1</i></b>                     | CGAGGTGATAGTGTGGTTTATG  | GTCTGTAGCATCAGGGTACT    |
| <b><i>PAEP</i></b>                     | ATGGCGACCAACAACATC      | CTCTCCAAGGACCTTCTTCT    |
| <b><i>LIF</i></b>                      | AACTGGCACAGCTCAATG      | ATAGCTTGTCCAGGTTGTTG    |
| <b><i>17HSD<math>\beta</math>2</i></b> | TGAATGTCAGCAGCATGG      | GGAAAGCTCCAGTCTCATAAC   |
| <b><i>GAPDH</i></b>                    | AACGTGTCAGTGGTGGACCTGA  | ACCACCCTGTTGCTGTAGCCAA  |
