# Supplementary material for: Establishment of Adenomyosis Organoids as a Preclinical Model to Study Infertility
Source: MDPI journal article supplement (doi:10.3390/jpm12020219), 2022-02-04
Supplement: s1 [file s1]

**Supplementary Table S2. Primary and secondary antibodies**

| <b>Antibody</b>                                    | <b>Company</b> | <b>Product number</b> | <b>Concentration</b> |
|----------------------------------------------------|----------------|-----------------------|----------------------|
| <b>Anti-MUC-1</b>                                  | Abcam          | ab109185              | 1:250                |
| <b>Anti-SOX9</b>                                   | Abcam          | ab185966              | 1:100                |
| <b>Anti-Ki67</b>                                   | Dako           | M7240                 | 1:100                |
| <b>Anti-TGF-<math>\beta</math>2</b>                | Abcam          | ab36495               | 1:1000               |
| <b>Anti-Smad3</b>                                  | Abcam          | ab40854               | 1:500                |
| <b>Anti-PanCK</b>                                  | Abcam          | ab86734               | 1:100                |
| <b>Anti-Vimentin</b>                               | Abcam          | ab92547               | 1:250                |
| <b>Anti-Laminin</b>                                | Abcam          | ab11575               | 1:200                |
| <b>Anti-acetylated <math>\alpha</math>-tubulin</b> | Santa Cruz Bt  | 611B1                 | 1:500                |
| <b>AlexaFluor 488 goat anti-mouse IgG1</b>         | Invitrogen     | A21121                | 1:500                |
| <b>AlexaFluor 555 goat-anti-rabbit IgG</b>         | Invitrogen     | A21429                | 1:500                |
| <b>AlexaFluor 488 goat anti-rabbit IgG</b>         | Invitrogen     | A11034                | 1:500                |
| <b>AlexaFluor 488 goat anti-mouse IgG</b>          | Invitrogen     | A11029                | 1:500                |
