# Supplementary material for: Establishment of Adenomyosis Organoids as a Preclinical Model to Study Infertility
Source: MDPI journal article supplement (doi:10.3390/jpm12020219), 2022-02-04
Supplement: s1 [file s1]

**Supplementary Table S1. Expansion medium (ExM) composition**

| <b>Product</b>                         | <b>Company</b>    | <b>Product number</b> | <b>Concentration in ExM</b> |
|----------------------------------------|-------------------|-----------------------|-----------------------------|
| <b>Advance DMEM/F12</b>                | Life Technologies | 12634010              | 1X                          |
| <b>N2 supplement</b>                   | Life Technologies | 17502048              | 1X                          |
| <b>B27 supplement minus vitamin A</b>  | Life Technologies | 12587010              | 1X                          |
| <b>Primocin</b>                        | Invivogen         | ant-pm-1              | 100 µg/ml                   |
| <b>N-Acetyl-L-cysteine</b>             | Sigma             | A9165                 | 1.25 mM                     |
| <b>L-glutamine</b>                     | Sigma             | G7513                 | 2 mM                        |
| <b>Recombinant human EGF</b>           | Peprotech         | AF-100-15             | 50 ng/ml                    |
| <b>Recombinant human Noggin</b>        | Peprotech         | 120-10c               | 100 ng/ml                   |
| <b>Recombinant human Rspodin-1</b>     | Peprotech         | 120-38                | 500 ng/ml                   |
| <b>Recombinant human FGF-10</b>        | Peprotech         | 100-26                | 100 ng/ml                   |
| <b>Recombinant human HGF</b>           | Peprotech         | 100-39                | 50 ng/ml                    |
| <b>ALK-4, -5, -7 inhibitor, A83-01</b> | Peprotech         | 9094360               | 500 nM                      |
| <b>Nicotinamide</b>                    | Sigma             | N0636                 | 10 nM                       |
