# Supplementary material for: Establishment of Adenomyosis Organoids as a Preclinical Model to Study Infertility
Source: J Pers Med. 2022 Feb 4;12(2):219. doi: 10.3390/jpm12020219 (PMC8876865; doi:10.3390/jpm12020219)
Supplement: Supplementary file 1 [file jpm-12-00219-s001.zip]

Archive with 4 entries (4 files):
- jpm-1546449 Figure S1.pdf
- Supplementary Table S1.pdf
- Supplementary Table S2.pdf
- Supplementary Table S3.pdf
